# Supplementary material
Source: PubMed Central journal article supplement (PMC2638890)
Supplement: ern184_1.pdf [file ern184_1.pdf]

Potato skin proteome is enriched with plant defence components. *Gilli Barel and Idit Ginzber*

Supplementary Data

**Supplementary Figure S1.** Representative images of 2-DE (pH interval of 4-7) of skin proteomes at four time points during tuber development (see Figure 1): 5 weeks post-sprout emergence (5W), when the skin is composed of only a few layers and suberization of the outer layers is just beginning; 8 weeks post-sprout emergence (8W), a period of active skin development; 5 days post-foilage removal to induce skin set (5dA); and 2 weeks after foliage removal (2WA), with mature skin that has almost set. The proteomes are similar. Some of the spots that are common for all proteomes are encircled with a dashed line for better identification of neighboring spots and to demonstrate the high similarity in the proteomes during skin development. A few spots exhibit high intensity on the 8W gel (light blue, green and purple circles). Dark blue line encircles POP\_A polypeptides, dark green line encircles a group of patatin proteins.

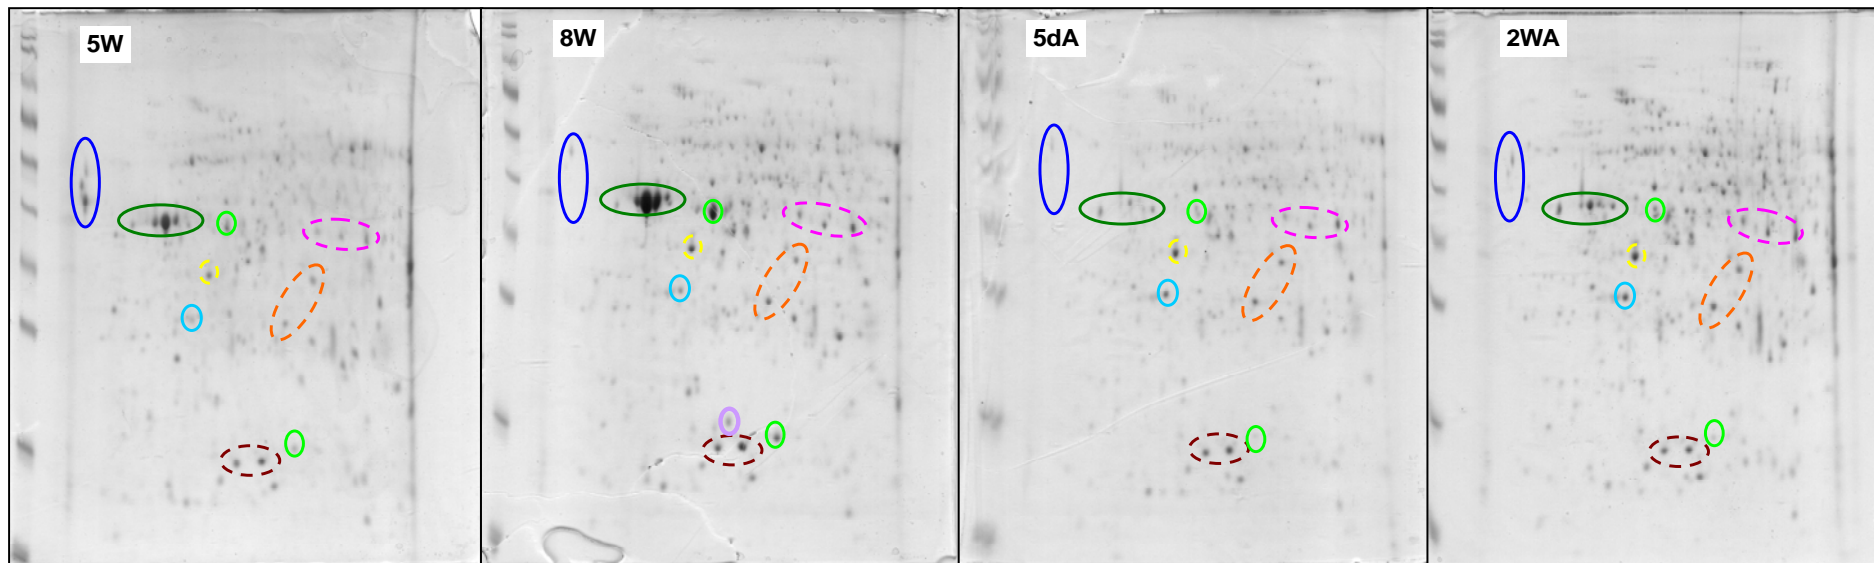

**Table S1.** Comparison of results obtained from TIGR potato EST database as of February 2007 and NCBI non-redundant protein database as of September 2006

| Functional categories                                                  | Potato TA <sup>a</sup> | Match peptides <sup>b</sup> | Cover (%) <sup>c</sup> | Swiss-Prot Identification |                                | Match peptides <sup>b</sup> | Cover (%) <sup>c</sup> |
|------------------------------------------------------------------------|------------------------|-----------------------------|------------------------|---------------------------|--------------------------------|-----------------------------|------------------------|
|                                                                        |                        |                             |                        | Accession number          | Organism                       |                             |                        |
| <b>Cell proliferation</b>                                              |                        |                             |                        |                           |                                |                             |                        |
| Actin (ACT)                                                            | TA24741                | 10                          | 21                     | AAW63030                  | <i>Isatis tinctoria</i>        | 9                           | 29                     |
| Adenosine kinase isoform 2S (ADK)                                      | TA25950                | 1                           | 8                      | ABB72823                  | <i>S. tuberosum</i>            | 2                           | 10                     |
| P23 tumor protein-like (P23/TCTP)                                      | TA24105                | 2                           | 10                     | ABB29923                  | <i>S. tuberosum</i>            | 2                           | 15                     |
| Proteasome $\alpha$ -7 subunit                                         | TA26206                | 6                           | 20                     | ABB86280                  | <i>S. tuberosum</i>            | 6                           | 28                     |
| Proteasome $\beta$ -2A subunit                                         | TA32826                | 8                           | 30                     | CAC43325                  | <i>Nicotina tabacum</i>        | 3                           | 19                     |
| Translation initiation factor 5A-3, eukaryotic (eIF-5A3)               | TA23158                | 6                           | 30                     | ABA81854                  | <i>S. tuberosum</i>            | 7                           | 51                     |
| Tubulin $\alpha$ -chain                                                | TA24049                | 11                          | 32                     | CAD13178                  | <i>N. tabacum</i>              | 11                          | 38                     |
| WD-40 repeat protein                                                   | TA26204                | 7                           | 16                     | UID                       |                                |                             |                        |
| <b>Signal transduction – cell wall</b>                                 |                        |                             |                        |                           |                                |                             |                        |
| Remorin (REM)                                                          | DN921712               | 4                           | 16                     | P93788                    | <i>S. tuberosum</i>            | 4                           | 21                     |
| <b>General metabolism</b>                                              |                        |                             |                        |                           |                                |                             |                        |
| UDP-glucose:protein transglucosylase (uptg2)                           | TA24497                | 9                           | 21                     | CAC84517                  | <i>S. tuberosum</i>            | 9                           | 32                     |
| Disulfide-isomerase protein (PDI)                                      | TA25269                | 5                           | 17                     | ABB02620                  | <i>S. tuberosum</i>            | 5                           | 23                     |
| <b>Oxidative respiratory chain</b>                                     |                        |                             |                        |                           |                                |                             |                        |
| APFI (Hypothetical protein F8G22.2)                                    | TA26786                | 4                           | 12                     | UID                       |                                |                             |                        |
| ATP synthase, mitochondrial, putative                                  | TA28240                | 1                           | 6                      | AAT40531                  | <i>S. demissum</i>             | 10                          | 62                     |
| NADH-ubiquinone oxidoreductase 18 kDa subunit, mitochondrial precursor | TA29219                | 2                           | 6                      | UID                       |                                |                             |                        |
| NADH:FMN oxidoreductase - like protein                                 | TA30877                | 5                           | 22                     | AAO12869                  | <i>Vitis vinifera</i>          | 4                           | 31                     |
| <b>One-carbon (C<sub>1</sub>) metabolism</b>                           |                        |                             |                        |                           |                                |                             |                        |
| Dihydrolipoamide dehydrogenase (LPD)                                   | TA28007                | 5                           | 21                     | AAN23154                  | <i>Lycopersicum esculentum</i> | 8                           | 21                     |
| Glutamate-ammonia ligase (GS1)                                         | TA25277                | 5                           | 21                     | AAB61597                  | <i>Hevea brasiliensis</i>      | 3,4                         | 18,19                  |
| Serine hydroxymethyltransferase 4 (SHMT4)                              | TA24707                | 10                          | 28                     | NP193129                  | <i>Aarabidopsis thaliana</i>   | 3                           | 9                      |
| Methionine synthase (MS)                                               | TA24454                | 11-16                       | 19-30                  | AAF74983                  | <i>S. tuberosum</i>            | 17,11                       | 38,22                  |
| <b>Carbohydrates metabolism</b>                                        |                        |                             |                        |                           |                                |                             |                        |
| Triose phosphate isomerase, (TPI) cytosolic                            | TA25726                | 3                           | 16                     | CAD13178                  | <i>N. tabacum</i>              | 11                          | 38                     |

|                                             |          |      |       |                            |                                |                   |                       |
|---------------------------------------------|----------|------|-------|----------------------------|--------------------------------|-------------------|-----------------------|
| Fructokinase-like (FK)                      | TA24175  | 2    | 7     | ABB29938                   | <i>S. tuberosum</i>            | 3                 | 14                    |
| <b>Abiotic and biotic stress</b>            |          |      |       |                            |                                |                   |                       |
| Plasma membrane polypeptide (DREPP)         | TA26238  | 9    | 25    | UID                        |                                |                   |                       |
| <b>Oxidative stress</b>                     |          |      |       |                            |                                |                   |                       |
| Aldo/keto reductase (AKR)                   | TA27942  | 2    | 7     | NP564762                   | <i>A. thaliana</i>             | 2                 | 11                    |
| Ascorbate peroxidase 1 (APX1), cytosolic    | TA24251  | 12   | 35    | AA Y21068                  | <i>Capsicum annuum</i>         | 10                | 46                    |
| Catalase isozyme 2 (CAT2)                   | TA23780  | 17   | 35    | CAA85470                   | <i>S. tuberosum</i>            | 18                | 46                    |
| Catechol oxidase B, chloroplast precursor   | TA25457  | 6    | 10    | AAC69365                   | <i>Diospyros kaki</i>          | 5                 | 13                    |
| Copper-zinc superoxide dismutase (CuZn-SOD) | TA24916  | 1    | 5     | UID                        |                                |                   |                       |
| Polyphenol oxidase (PPO)                    | TA24911  | 7    | 11    | CAA78300                   | <i>S. lycopersicum</i>         | 2                 | 4                     |
| Polyphenol oxidase (PPO), precursor         | TA25456  | 8    | 14    | UID                        |                                |                   |                       |
| Polyphenol oxidase, precursor (PPO)         | CV429604 | 1    | 5     | AAC69365                   | <i>D. kaki</i>                 | 6                 | 17                    |
| <b>Plant defense</b>                        |          |      |       |                            |                                |                   |                       |
| Alpha-galactosidase, putative               | TA35770  | 2    | 12    | UID                        |                                |                   |                       |
| Cysteine protease 1 (CYP1)                  | CK256743 | 3    | 8     | CAB53515                   | <i>S. tuberosum</i>            | 4                 | 8                     |
| Elicitor-inducible protein EIG-J7           | TA32425  | 3    | 12    | AAR83862                   | <i>C. annuum</i>               | 2                 | 15                    |
| Elicitor-inducible protein EIG-J7           | TA36879  | 2    | 8     | XP467841                   | <i>japonica cultivar-group</i> | 1                 | 5                     |
| Elicitor-inducible protein EIG-J7           | TA39811  | 4    | 15    | UID                        |                                |                   |                       |
| Endochitinase 2 precursor                   | TA24214  | 4    | 18    | AAP32201                   | <i>S. dulcamara</i>            | 3                 | 19                    |
| Endochitinase 2 precursor                   | CN213814 | 2    | 11    | AAP32201                   | <i>S. dulcamara</i>            | 2,2               | 11,11                 |
| Kunitz-type proteinase inhibitor group B5   | CV502293 | 3    | 12    | CAA31852                   | <i>S. tuberosum</i>            | 1                 | 6                     |
| Major latex protein-like, protein 28 (MLP)  | TA35293  | 2    | 12    | UID                        |                                |                   |                       |
| Patatin                                     | TA23294  | 3-9  | 10-27 | AAZ75962                   | <i>S. tuberosum</i>            | 8,3,9,<br>10,10,7 | 25,11,25,<br>30,30,23 |
| Patatin                                     | CN515681 | 2    | 11    | ABC55700                   | <i>S. tuberosum</i>            | 1                 | 4                     |
| Patatin putative homolog                    | TA35081  | 5    | 14    | BAD38550                   | <i>Oryza sativa</i>            | 1                 | 7                     |
| Patatin protein 07                          | TA23344  | 3-11 | 9-26  | ABC55694,<br>ABC55690, UID | <i>S. tuberosum</i>            | 11,10             | 30,30                 |
| Pathogenesis-related protein 10 (PR-10)     | CN213132 | 10   | 38    | BAD95797                   | <i>L. esculentum</i>           | 2                 | 12                    |
| Pathogenesis-related protein 10 (PR-10)     | TA22962  | 3    | 13    | BAD95797                   | <i>L. esculentum</i>           | 1                 | 8                     |

|                                                                |          |       |       |          |                       |   |    |
|----------------------------------------------------------------|----------|-------|-------|----------|-----------------------|---|----|
| Pathogenesis-related protein 10 (PR-10)                        | TA22953  | 4     | 22    | AAU00066 | <i>S. virginianum</i> | 2 | 14 |
| <b>Synthesis of plant defense compounds</b>                    |          |       |       |          |                       |   |    |
| Arginase 1                                                     | TA28681  | 6     | 19    | UID      |                       |   |    |
| Hyoscyamine 6-beta-hydroxylase-like protein (H6H)              | BQ506105 | 2     | 11    | BAC23050 | <i>S. tuberosum</i>   | 2 | 9  |
| 2- oxoglutarate-dependent dioxygenase (SPP2)                   | TA24517  | 3     | 9     | AAC95363 | <i>S. chacoense</i>   | 4 | 15 |
| 2- oxoglutarate-Fe(II) oxygenase                               | TA29527  | 3     | 9     | UID      |                       |   |    |
| Phenylcoumaran benzylic ether reductase (PCBER)                | TA28775  | 2     | 8     | UID      |                       |   |    |
| <b>Suberization/lignification</b>                              |          |       |       |          |                       |   |    |
| ACP-17kD beta-hydroxyacyl-acyl carrier protein                 | TA29588  | 6     | 17    | NP193129 | <i>A. thaliana</i>    | 3 | 9  |
| Caffeoyl-CoA O-methyltransferase -5 (CCoAOMT-5)                | TA33337  | 6     | 26    | AAM64800 | <i>A. thaliana</i>    | 1 | 4  |
| Caffeoyl-CoA O-methyltransferase- 6 (CCoAOMT-6)                | TA30542  | 7     | 29    | BAC23054 | <i>S. tuberosum</i>   | 2 | 12 |
| Caffeoyl-CoA O-methyltransferase -3 (CCoAOMT-3)                | TA30485  | 4     | 14    | UID      |                       |   |    |
| Peroxidase (POD 18)                                            | TA25873  | 10-11 | 27-28 | UID      |                       |   |    |
| peroxidase PER9-6 secretory (POD 20)                           | TA23216  | 12    | 22    | AAK52084 | <i>N. tabacum</i>     | 9 | 22 |
| Peroxidase 136, class III, precursor (POD 9)                   | TA39454  | 10    | 34    | UID      |                       |   |    |
| Peroxidase putative (POD 5)                                    | CV504265 | 3     | 12    | UID      |                       |   |    |
| Peroxidase, suberization-associated anionic peroxidase (POP_A) | TA25019  | 5     | 15    | CAA33852 | <i>L. esculentum</i>  | 3 | 11 |
| <b>Reference protein</b>                                       |          |       |       |          |                       |   |    |
| Nascent polypeptide-associated complex NAC; UBA-like           | TA25576  | 4     | 20    | AAB18266 | <i>N. tabacum</i>     | 2 | 68 |

a - Potato Transcript Assemblies; b – number of peptides identified; c- sequence coverage in between (%)

\* - Calculated using the most similar protein; † - spot that contains more than one protein; UID- unidentified

**Table S2.** List of skin proteins from differential spots that contained two proteins

| Functional categories                             | Potato TA <sup>a</sup> | Match peptides <sup>b</sup> | Cover (%) <sup>c</sup> | MW(kDa)/pI   |             |
|---------------------------------------------------|------------------------|-----------------------------|------------------------|--------------|-------------|
|                                                   |                        |                             |                        | Experimental | Theoretical |
| <b>Cell proliferation</b>                         |                        |                             |                        |              |             |
| Adenosine kinase isoform 2S (ADK)                 | TA25950                | 1                           | 8                      | 38.1/4.96    | 37.55/5.2*  |
| WD-40 repeat protein                              | TA26204                | 7                           | 16                     | 38/4.8       | 37.7/5.4    |
| <b>General metabolism</b>                         |                        |                             |                        |              |             |
| <b>Oxidative respiratory chain</b>                |                        |                             |                        |              |             |
| ATP synthase, mitochondrial, putative             | TA28240                | 1                           | 6                      | 19/4.93      | 21/5.4      |
| <b>One-carbon (C<sub>1</sub>) metabolism</b>      |                        |                             |                        |              |             |
| Dihydrolipoamide dehydrogenase (LPD)              | TA28007                | 5                           | 21                     | 53.7/6.6     | 33.2/9.3    |
| <b>Carbohydrates metabolism</b>                   |                        |                             |                        |              |             |
| Fructokinase-like (FK)                            | TA24175                | 2                           | 7                      | 31.2/5.3     | 35/5.6      |
| <b>Abiotic and biotic stress</b>                  |                        |                             |                        |              |             |
| <b>Oxidative stress</b>                           |                        |                             |                        |              |             |
| Aldo/keto reductase (AKR)                         | TA27942                | 2                           | 7                      | 36.9/5.8     | 37.7/6.1    |
| Copper-zinc superoxide dismutase (CuZn-SOD)       | TA24916                | 1                           | 5                      | 16/6.48      | 15.3/5.47   |
| Polyphenol oxidase (PPO), precursor               | TA25456                | 8                           | 14                     | 53.7/6.6     | 66/6.4      |
| Polyphenol oxidase, precursor (PPO)               | CV429604               | 1                           | 5                      | 57.3/6.07    | 66.2/6.3*   |
| <b>Plant defense</b>                              |                        |                             |                        |              |             |
| Alpha-galactosidase, putative                     | TA35770                | 2                           | 12                     | 41/6         | 48.4/4.7*   |
| Elicitor-inducible protein EIG-J7                 | TA36879                | 2                           | 8                      | 16/6.48      | 20/6.88     |
| Major latex protein-like, protein 28 (MLP)        | TA35293                | 2                           | 12                     | 16.9/5.33    | 17.2/4.91   |
| Patatin                                           | CN515681               | 2                           | 11                     | 39.7/5.55    | 42.6/5.3*   |
| Pathogenesis-related protein 10 (PR-10)           | TA22953                | 4                           | 22                     | 16.9/5.33    | 17.4/5.2    |
| <b>Synthesis of plant defense compounds</b>       |                        |                             |                        |              |             |
| Arginase 1                                        | TA28681                | 6                           | 19                     | 37.5/4.8     | 37.01/5.66  |
| Hyoscyamine 6-beta-hydroxylase-like protein (H6H) | BQ506105               | 2                           | 11                     | 39.5/5.75    | 37.9/5.54*  |
| 2-oxoglutarate-Fe(II) oxygenase                   | TA29527                | 3                           | 9                      | 39.7/5.55    | 40.9/6.1*   |

a - Potato Transcript Assemblies; b – number of peptides identified; c- sequence coverage in between (%)

\* - Calculated using the most similar protein
